# Supplementary material for: TEFM (c17orf42) is necessary for transcription of human mtDNA
Source: PubMed Central journal article supplement — Nucleic Acids Res. 2011 Jan 27;39(10):4284–99. doi: 10.1093/nar/gkq1224 (PMC3105396; doi:10.1093/nar/gkq1224), 2011-01-27

Figure S1 - Minczuk et al.

Secondary structure  
*Homo sapiens* 159: S I I S I V F G T R R I A W A H L (1) R K L T V L - - D W Q Q S D R W S : 191  
*Danio rerio* 176: S I I S I V C G T N K I A W A H M (1) R A R T V L - - D W Q Q A E C Q S : 208  
*Trichoplax adhaerens* 137: S I V S I D L G F K N F A Y V H I (1) R E L T L L - - D W R K L C F - - : 167  
*Saccharomyces cerevisiae* 68: N I L S M D A G V S N F A F S K M (5) D P L P K V - L D W Q K I N L E E : 105  
*Schizosaccharomyces pombe* 41: R V L G I D L G I K N F S Y C F A (4) D S K V I I - H N W S V E N L T E : 77  
*Escherichia coli* 3: I I L G I D P G S R V T G Y G V I (3) G R Q T S Y L G S - G C I R T K - : 37  
*Rickettsia prowazekii* 14: I V L G I D P A L G K L G W A V V (3) S T K T H Y L A S - G T I K T H S : 49  
*Cowpox virus* 25: I I C A F D I G A K N P A R T V L (1) - - - - - V K D - - - - : 45  
70% consensus p l l t h n t p p h t r s h h h h

Secondary structure  
*Homo sapiens* 193: M R G I Y S S S V Y L E E I S S I I S K M P K A D F Y V L E K T G L S : 225  
*Danio rerio* 210: M K G T Y L A S D Y L E D I S S V I S S F P A A D F F L V E K P S I S : 244  
*Trichoplax adhaerens* 171: T S N S L Q T - T Y E N V I G - I R R T L P A A D V Y V I E Q A S A T : 203  
*Saccharomyces cerevisiae* 117: N P A E T S E L V F N L T - E Y L F E S M P I P D M F T I E R Q R T R : 150  
*Schizosaccharomyces pombe* 90: Q P S S M A D L S I Q L F - N T L H E - K F N P H V I L M E R Q R Y R : 122  
*Escherichia coli* 41: L P S R L K L I Y A G V T - - - E I I T Q F Q P D Y F A I E Q V F M A : 72  
*Rickettsia prowazekii* 53: I H N R L A F I N S I L E - - - K V I L E Y Q P N I A A I E T F V N : 84  
*Cowpox virus* 51: L D - - I S K L D W - - - - S S D W E R (7) Q Y E Y T V L L E R Q P R - : 85  
70% consensus h h p s p h h h E p p

Secondary structure  
*Homo sapiens* 235: P I L L H F H I M E A M L Y A L L N (9) Q V L S M N R R N A V G K H F : 275  
*Danio rerio* 252: P V M V H L R T V E A M L F A L L S (9) K V L N M M R I S V G R H F : 292  
*Trichoplax adhaerens* 211: N T G I P L R I L E A F L Y C V L Q (2) K V V S M N A K T V Q S Y F : 242  
*Saccharomyces cerevisiae* 159: D P I L K V N I L E Q I L F S N L E (17) M V C S S D P H R M T S Y W : 207  
*Schizosaccharomyces pombe* 130: E W T L R V N M L E S M L Y A L H Y (14) F L L S L S P K S T Y S Y W : 175  
*Escherichia coli* 76: D S A L K L G Q A R G V A I V A A V (4) P V F E Y A A R Q V K Q T V : 111  
*Rickettsia prowazekii* 88: V T S L K L G Y A R G A I M S L I G (4) D M Q E F K P N T V K K T V : 123  
*Cowpox virus* 94: Y F I K G F L Y H T - - - - - (3) K V I C V S P V M S G S Y R : 121  
70% consensus h h h c t h h h h h h h h h h p h h

Secondary structure  
*Homo sapiens* 281: D S R T S G K E L V K Q F L F (32) E E L Y D S L L Q A I A F Y E L : 343  
*Danio rerio* 298: D C R T S G A E T L R K M M T (32) E E M C D A L L Q A V A F F E L : 360  
*Trichoplax adhaerens* 252: K K T - D A I N K V L E L M N (24) D D L S D C L L Q A L T F Y D K : 303  
*Saccharomyces cerevisiae* 226: H S K D S R I K L V K K I L S (53) D D L A D S F L H C L S W M E W : 308  
*Schizosaccharomyces pombe* 186: S K K K S R V Q M V K E L I D (25) D D M A D S A L I A S G W M R W : 241  
*Escherichia coli* 114: I G S A E K S Q V Q H M V R T (9) A D A A D A L A I A I T H - C H : 152  
*Rickettsia prowazekii* 126: Y G H A G K E Q I L Y M I K H (10) S D E A D A V A L A Y T C - L V : 165  
*Cowpox virus* 122: D R K K R S V E A F L D W M - (15) D D V A D S F N L A M R Y V L D : 166  
70% consensus p p p h h h h p n h h n s h h s h h h h

Figure S2 - Minczuk *et al.*

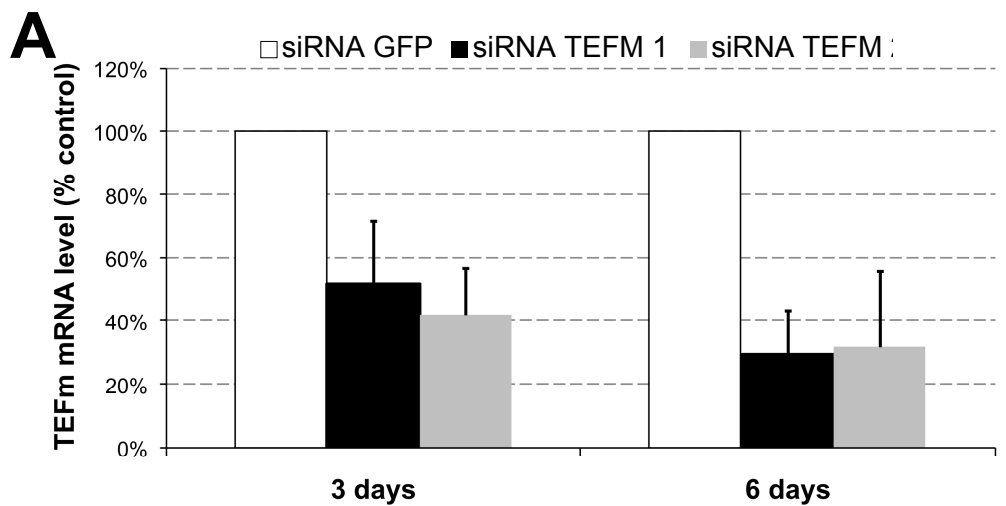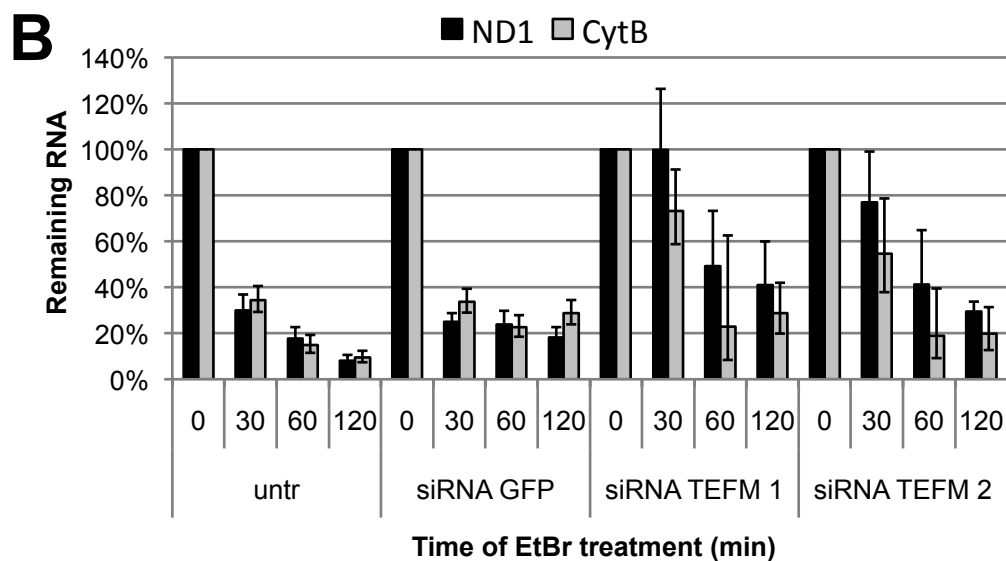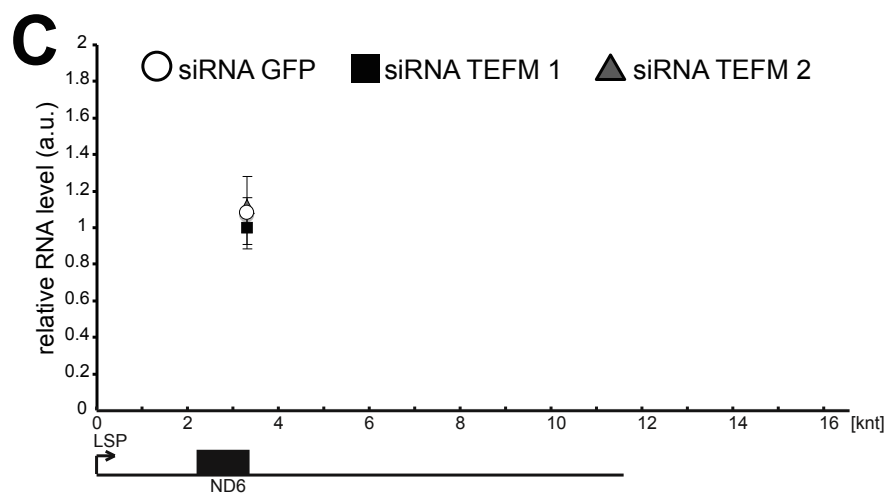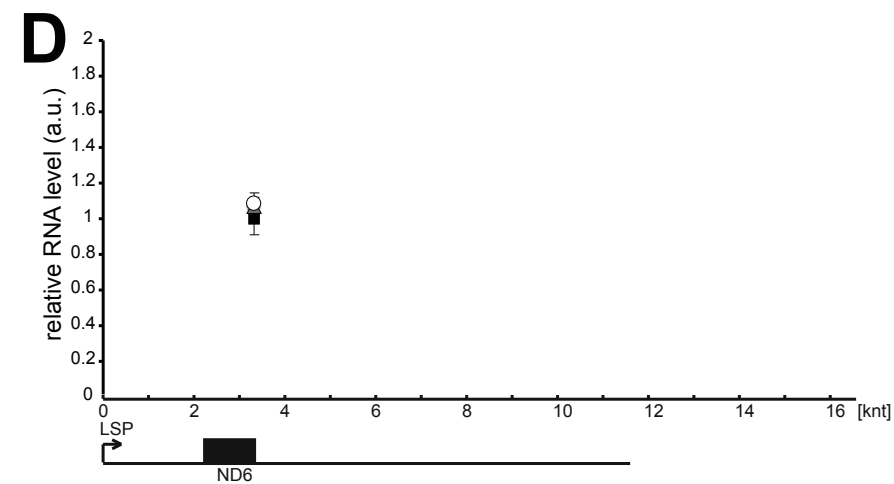

Figure S3 - Minczuk *et al.*

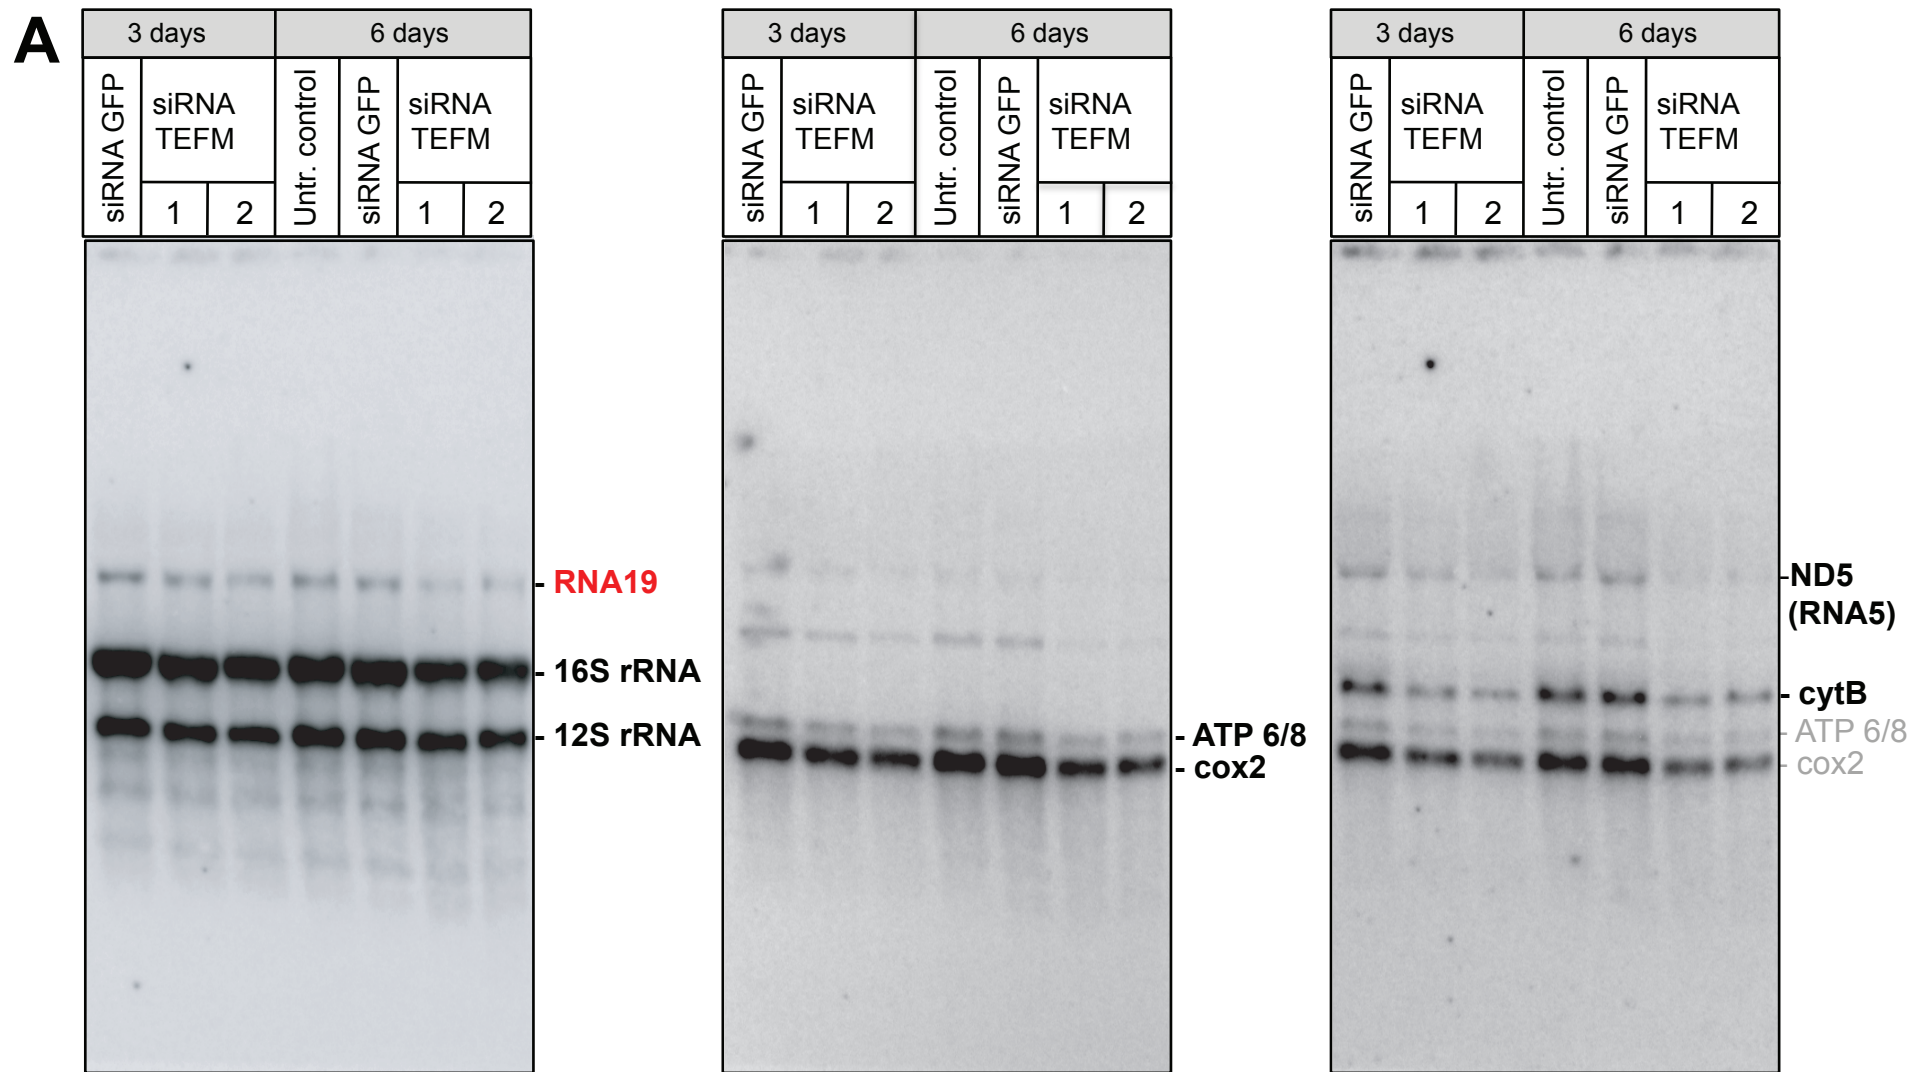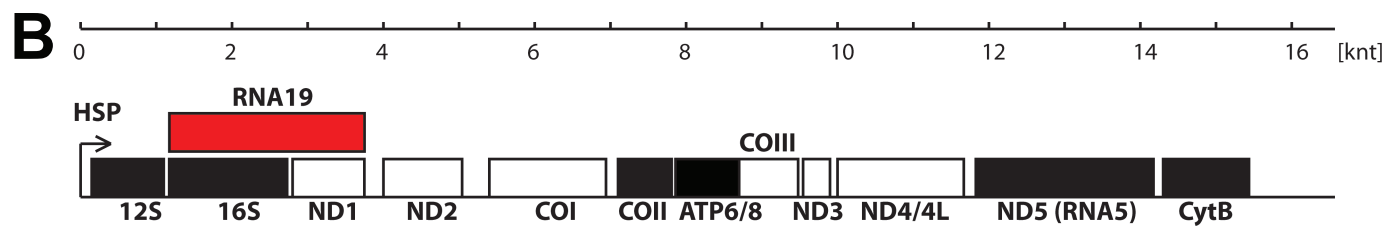

Figure S4 - Minczuk et al.

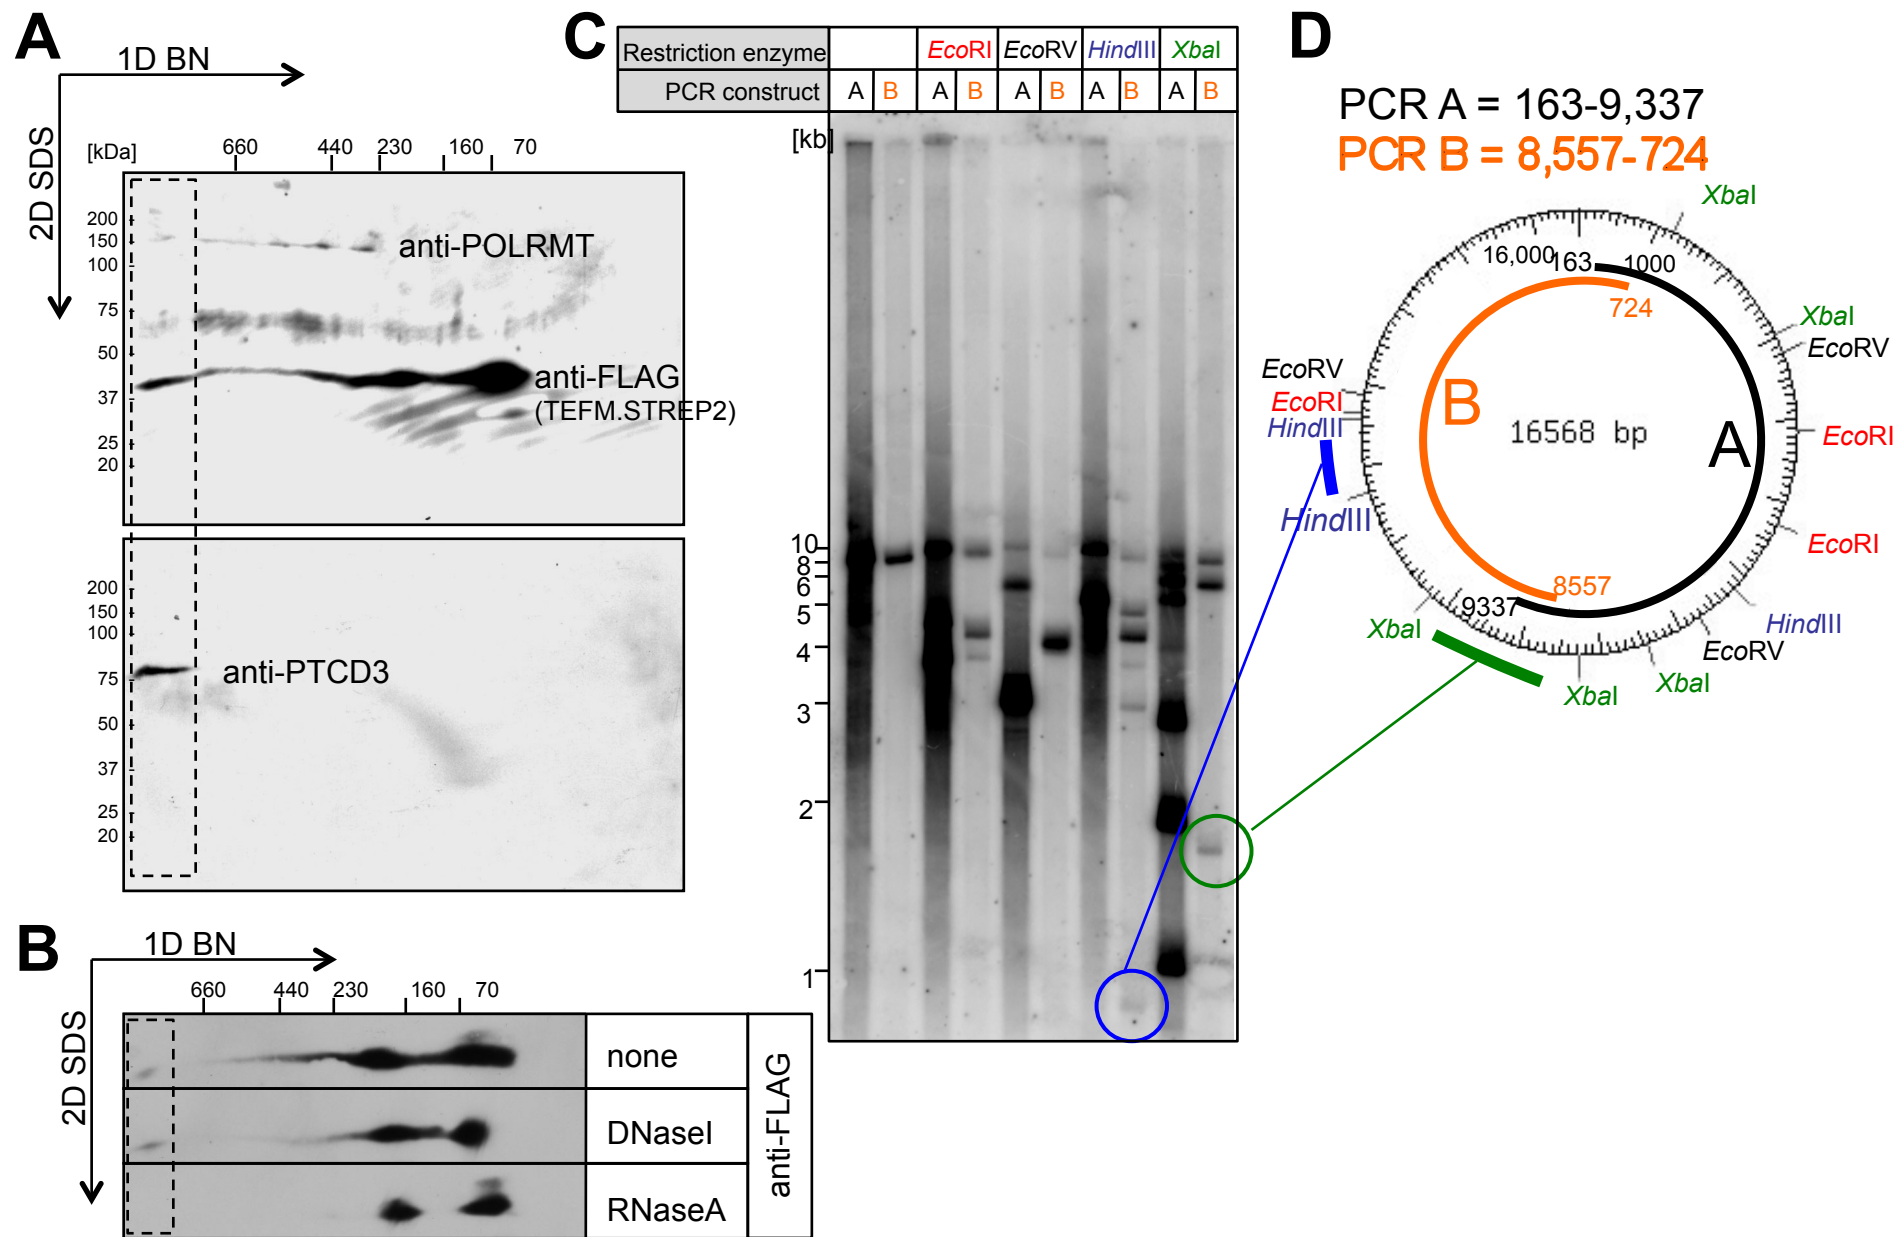

Figure S5 - Minczuk *et al.*

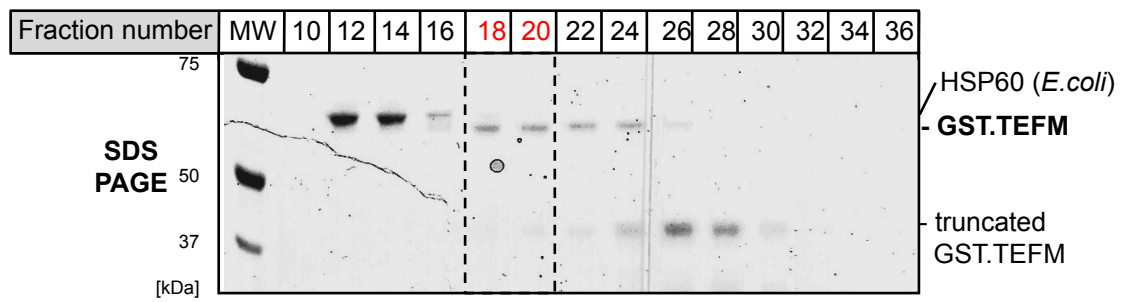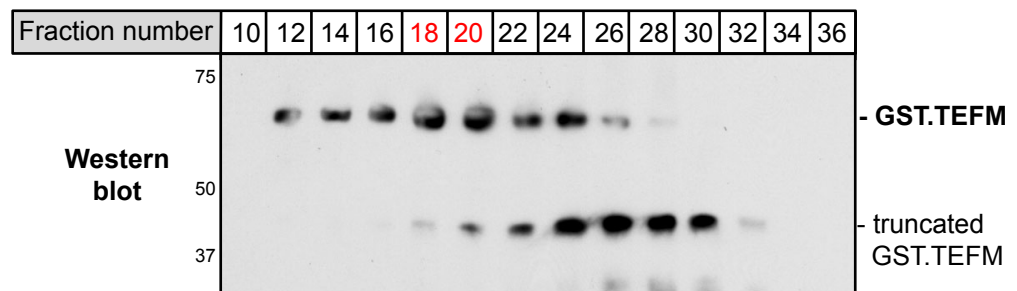

Figure S6 - Minczuk et al.

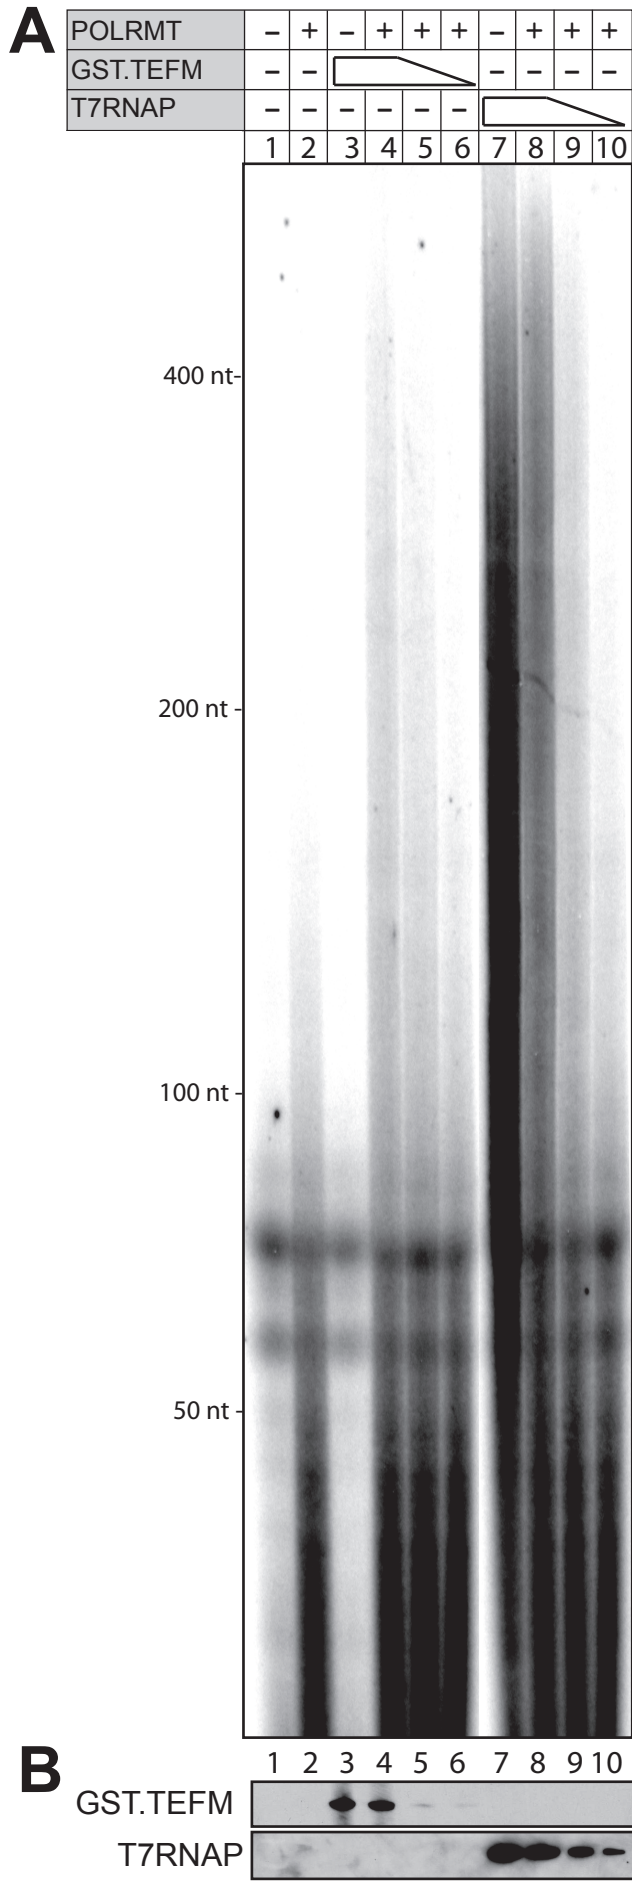

Supplement: supp_gkq1224_NAR-02462-V-2010_Supp_Figures.pdf [file supp_gkq1224_NAR-02462-V-2010_Supp_Figures.pdf]
